# Supplementary material for: Gum karaya (Sterculia urens) stabilized zero-valent iron nanoparticles: characterization and applications for the removal of chromium and volatile organic pollutants from water
Source: Royal Society of Chemistry journal article supplement (doi:10.1039/c7ra00464h), 2017-01-01
Supplement: c7ra00464h1.pdf [file c7ra00464h1.pdf]

**Supplementary Information: Ref. MS ID- RA-ART-01-2017-000464: Title: ‘*Gum Karaya (Sterculia urens)* stabilized Zero-Valent Iron Nanoparticles: Characterization and Applications for the Removal of Chromium and Volatile Organic Pollutants from Water’**

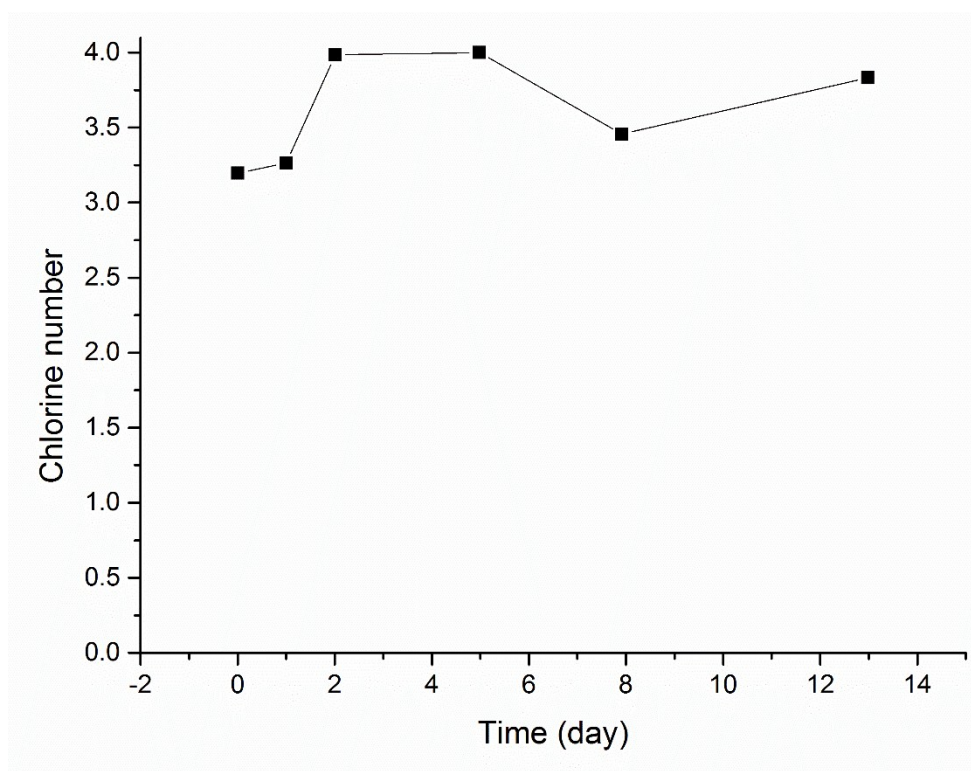

Figure S 1 (supplementary information) : The variation of chlorine number as a function of time during the dechlorination process.
